# Supplementary material for: Fast preparation of ultrafine monolayered transition-metal dichalcogenide quantum dots using electrochemical shock for explosive detection
Source: Royal Society of Chemistry journal article supplement (doi:10.1039/c6cc06325j), 2016-01-01
Supplement: c6cc06325j1.pdf [file c6cc06325j1.pdf]

## Supporting Information

# Fast Preparation of Ultrafine Monolayered Transition-Metal Dichalcogenide Quantum Dots using Electrochemical Shock for Explosive Detection

Zhigang Chen,<sup>ab</sup> Zhengxu Tao,<sup>b</sup> Shan Cong,<sup>b</sup> Junyu Hou,<sup>c</sup> Dengsong Zhang,<sup>a\*</sup> Fengxia Geng,<sup>c</sup> Zhigang Zhao<sup>b\*</sup>

<sup>a</sup>Department of Chemistry, College of Science, Shanghai University, Shanghai 200444, P. R. China

<sup>b</sup>Key Lab of Nanodevices and Applications, Suzhou Institute of Nano-Tech and Nano-Bionics,  
Chinese Academy of Sciences (CAS), Suzhou 215123, China.

<sup>c</sup>College of Chemistry, Chemical Engineering and Materials Science, Soochow University, Suzhou 215123, China.

## Experimental Section

**Chemicals:** Tungsten sulfide (WS<sub>2</sub>, 99.9%, Aladdin, USA), molybdenum sulfide (MoS<sub>2</sub>, 98%, Aladdin, USA), tungsten selenide (WSe<sub>2</sub>, 99.8%, Aladdin, USA), molybdenum selenide (MoSe<sub>2</sub>, 99.9%, Alfa Aesar, USA), poly(vinylidene fluoride) (PVDF, Sigma, Germany), 1-methyl-2-pyrrolidinone (NMP, 98%, Aladdin USA), oleic acid (OA, aladdin, USA).

**Preparation of working electrode and electrochemical shock:** In a typical procedure, bulk TMD crystals (i. e. WS<sub>2</sub>, MoS<sub>2</sub>, WSe<sub>2</sub>, MoSe<sub>2</sub>) were prepared as working electrode by mixing with acetylene black and poly(vinylidene fluoride) (PVDF) dispersed in N-methylpyrrolidone (NMP) solutions. In the mixed slurry, the mass ratio of the bulk TMD material, acetylene black, and PVDF was 80:10:10. The resulting slurry was then uniformly coated on a copper foil and vacuum-dried at 100°C overnight. Electrochemical nailing of Al<sup>3+</sup> ions was performed in an open-air type cell with a CHI660 electrochemical workstation using a three-electrode system at room temperature. A platinum disk and an Ag/AgCl electrode were used for the counter and reference electrodes, respectively. 1 M Al<sup>3+</sup> ion-containing propylene carbonate (PC) solution was used as the electrolyte. The current density during the discharge process after optimization was 0.11 mA/cm<sup>2</sup>, 0.056 mA/cm<sup>2</sup>, 0.056 mA/cm<sup>2</sup>, 0.033 mA/cm<sup>2</sup> for WS<sub>2</sub>, MoS<sub>2</sub>, WSe<sub>2</sub>, MoSe<sub>2</sub>, respectively. After the discharge process, the sample was washed with acetone to remove the residual organic materials, followed by 10 min's ultrasonication in oleic acid/ethanol solution (v:v~0.5:30). After the suspension was centrifuged, TMD QDs were obtained for further characterizations.

**Characterization:** A drop of a solution containing the produced TMD QDs were placed on a holey carbon-coated copper grid or a mica plate, and then naturally dried in air prior to characterization with transmission electron microscopy (TEM, FEI Technai G20) coupled with a field emission gun and EDS unit, atomic force microscopy (AFM, Bruker Instrument Dimension Icon), Raman spectrum was recorded on a LabRAM HR Raman spectrometer (HORIBA Jobin Yvon) with excitation laser of 532 nm. FT-IR spectra of QDs in KBr pellets were acquired using a Nicolet 6700 FT-IR spectrometer. UV-Vis absorption measurement was carried out on a UV-Vis spectrophotometer (V660, JASCO), PL were recorded on a fluorolog-3 fluorescence spectrophotometer.

**Explosive detection.** In typical experiment setup, 50 µL of TNP (10<sup>-2</sup>, 10<sup>-3</sup>, 10<sup>-4</sup>, 10<sup>-5</sup> M, respectively) was added to cuvette containing 3 mL of WS<sub>2</sub> QDs under gently shake, the photoluminescence of pure WS<sub>2</sub> QDs upon excitation at 370 nm was measured, then the quenching experiment was set after the incremental addition of freshly prepared quencher, other control experiments were carried out according to the method described above.

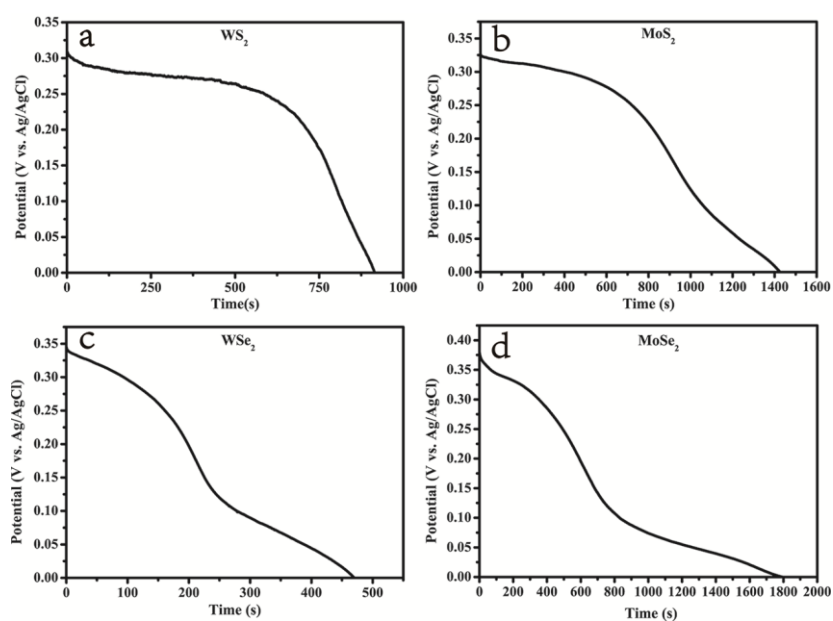

**Figure S1.** Galvanostatic discharge curves for a)  $\text{WS}_2$ , b)  $\text{MoS}_2$ , c)  $\text{WSe}_2$ , d)  $\text{MoSe}_2$ .

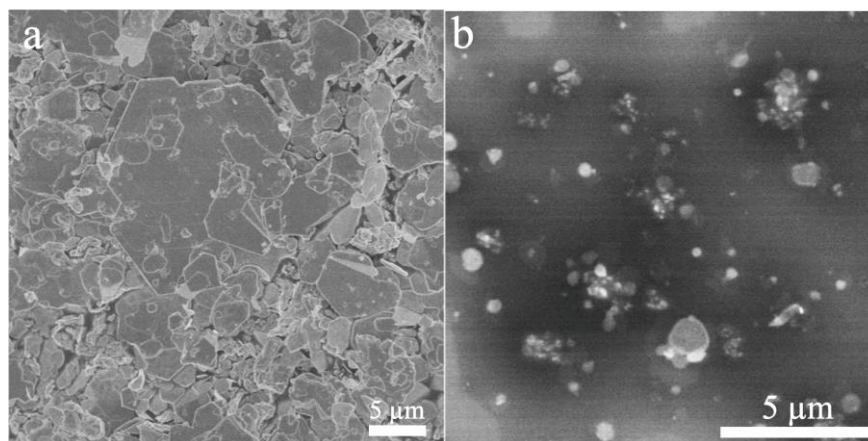

**Figure S2.** Typical SEM image before (a) and after (b) electrochemical shock

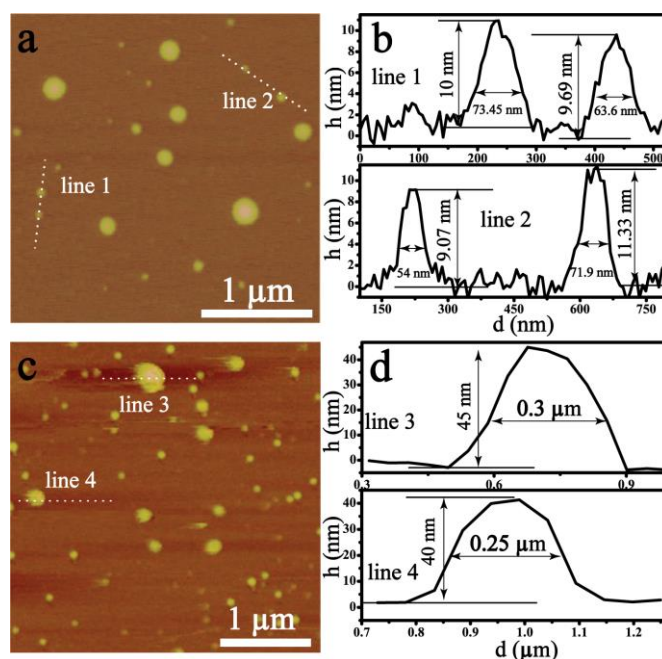

**Figure S3.** AFM images of WS<sub>2</sub>. (a) WS<sub>2</sub> without oleic acid treatment. (b) Size profiles along the white dashed line in (a). (c) WS<sub>2</sub> without Al<sup>3+</sup> ion treatment. (d) Size profiles along the white dashed line in (c). Without oleic acid treatment, the samples exhibit a large lateral size of dozens of nanometers, although their thickness is only several nanometers (Fig. S3b). Without Al<sup>3+</sup> ion treatment, WS<sub>2</sub> QDs can hardly be obtained, but only see particles larger than several hundred nanometers (Fig. S3d). These results confirm that oleic acid and Al<sup>3+</sup> ion treatment are crucial to a successful fabrication of ultrafine QDs with high dispersion.

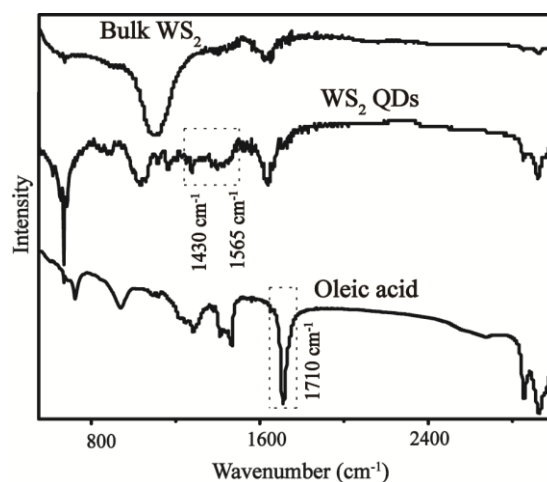

**Figure S4.** FTIR spectra of bulk WS<sub>2</sub>, pristine oleic acid and the as-prepared WS<sub>2</sub> QDs. The sharp band at 1710 cm<sup>-1</sup> deriving from C=O stretch is absent in the FTIR of WS<sub>2</sub> QDs, while there appear two new peaks at 1430 and 1560 cm<sup>-1</sup>, which can be attributed to the asymmetric  $\nu_{as}(COO^-)$  and  $\nu_s(COO^-)$  stretch between the carboxylate head of oleic acid and W atom.<sup>1</sup>

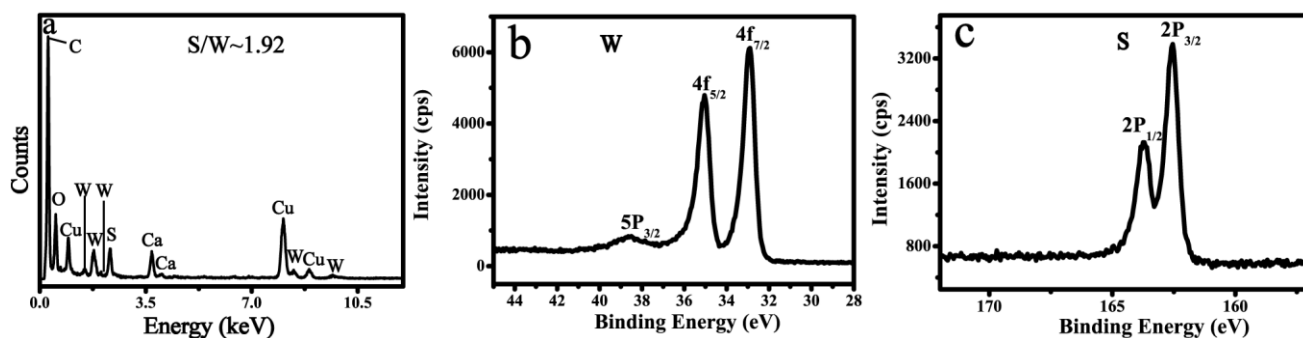

**Figure S5.** EDS and XPS spectra of the as-prepared WS<sub>2</sub> QDs. The signal of Cu, C, O and Ca elements originates from the copper grid and acetylene black impurity.

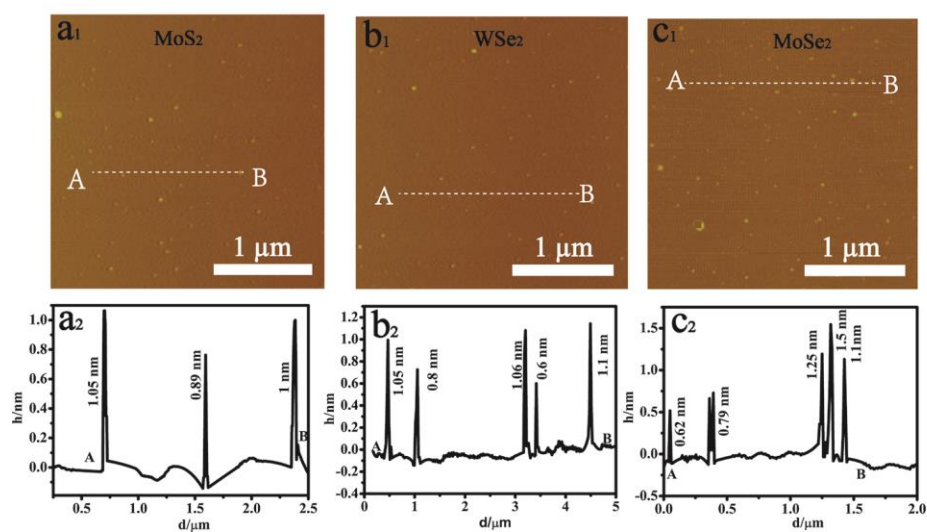

**Figure S6.** AFM images for a<sub>1</sub>) MoS<sub>2</sub>, b<sub>1</sub>) WSe<sub>2</sub>, c<sub>1</sub>) MoSe<sub>2</sub>, which give average thickness of  $\sim 0.78$  nm,  $\sim 0.72$  nm,  $\sim 1$  nm for a<sub>2</sub>) MoS<sub>2</sub>, b<sub>2</sub>) WSe<sub>2</sub>, c<sub>2</sub>) MoSe<sub>2</sub> respectively, confirming other monolayer TMD QDs could also be successfully produced by our method.

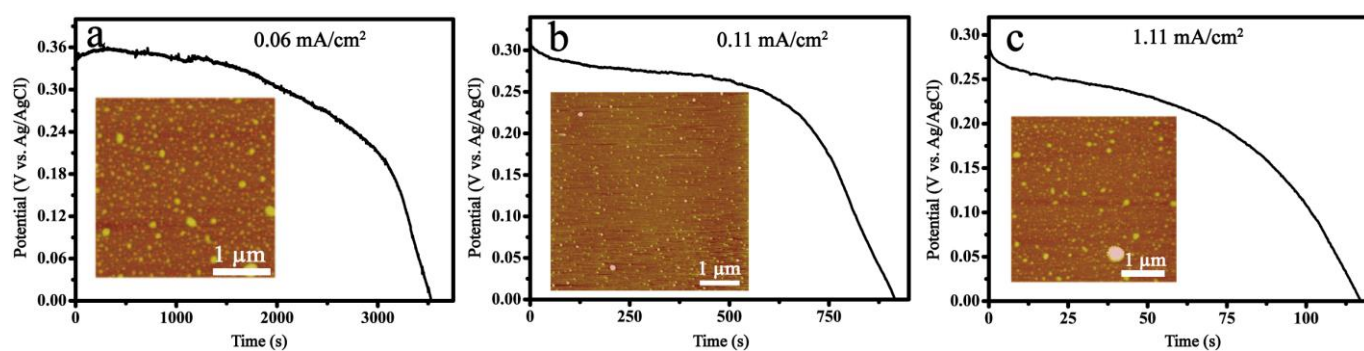

**Figure S7.** The discharge curves and corresponding AFM images under different current density for a) 0.06 mA/cm<sup>2</sup>, b) 0.11 mA/cm<sup>2</sup>, c) 1.11 mA/cm<sup>2</sup>.

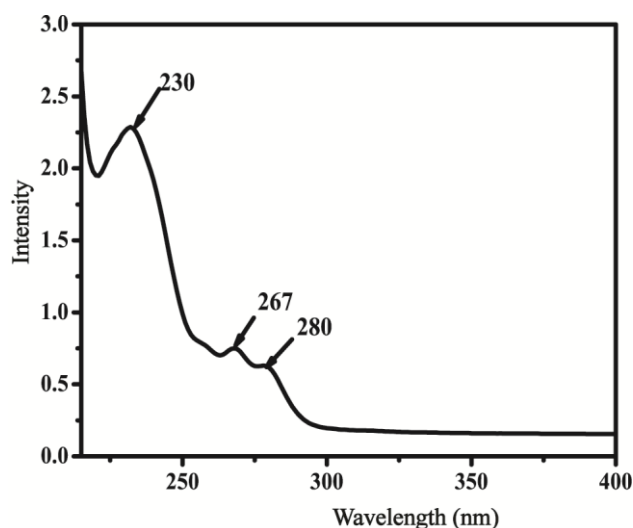

**Figure S8.** UV spectrum of pristine oleic acid, confirming the blue shift of the WS<sub>2</sub> QDs does not result from the adding of oleic acid in figure 3b.

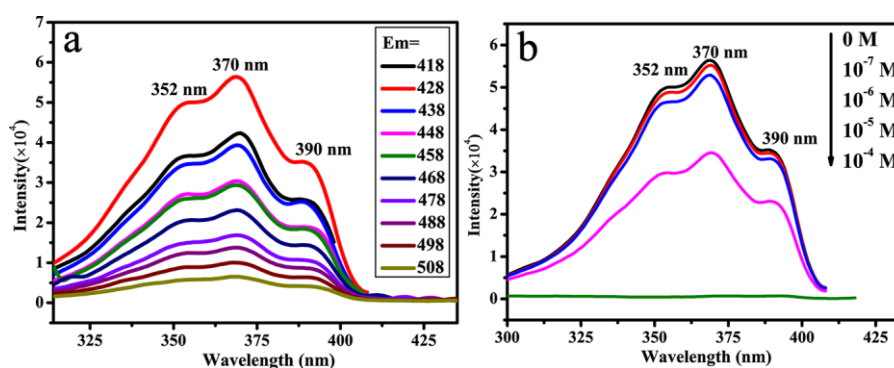

**Figure S9.** a) Photoluminescence excitation spectra (PLE) of pure WS<sub>2</sub> QDs with various excitation wavelengths. b) PLE spectra of WS<sub>2</sub> QDs in the presence of different TNP with different concentrations under the emission wavelength at 428 nm.

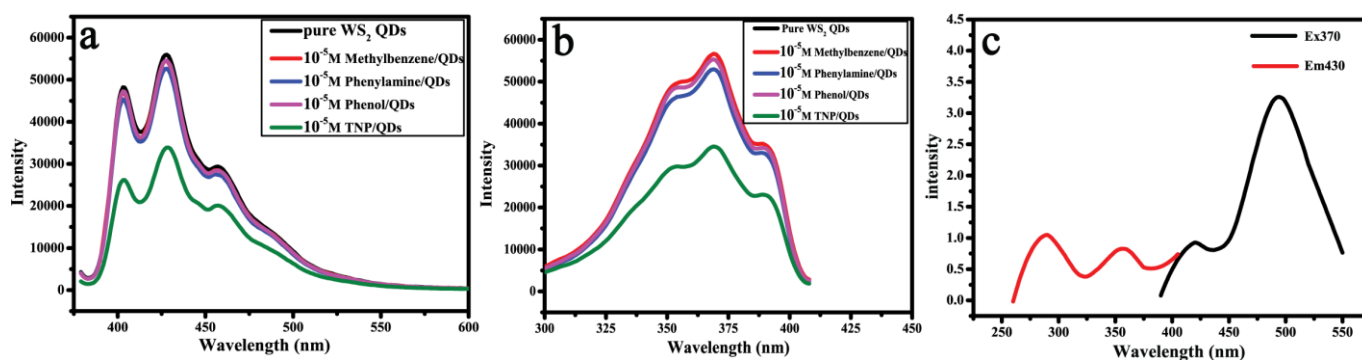

**Figure S10.** a) PL spectra of WS<sub>2</sub> QDs solution under excitation at 370 nm with different quenchers. b) The corresponding PLE spectra under emission at 430 nm. c) PL and PLE spectra of pure TNP solution.

**Table S1** Production yield of quantum dots from literatures<sup>2-4</sup>

| Reference                 | QDs             | Method                             | Production yield (mg/min) |
|---------------------------|-----------------|------------------------------------|---------------------------|
| Yang et al. <sup>2</sup>  | WS <sub>2</sub> | Direct sonication                  | 0.016                     |
| Zhang et al. <sup>3</sup> | Graphene        | K insertion under vacuum condition | 0.045                     |
| Seo et al. <sup>4</sup>   | Graphene oxide  | Wet chemical synthesis/sonication  | 0.66                      |
| Our work                  | WS <sub>2</sub> | electrochemical shock              | 0.02                      |

#### Notes and references

1 S. V. P. Vattikuti, C. Byon and Chittun, V, *Superlattice Microstruct.*, 2016, **94**, 39-50.

2 X. Zhao, X. Ma, J. Sun, D. H. Li and X. R. Yang, *ACS Nano*, 2016, **10**, 2159-2166.

3 L. X. Lin and S. W. Zhang, *Chem. Commun.*, 2012, **48**, 10177-10179.

4 F. Liu, M. H. Jang, H. D. Ha, J. H. Kim, Y. H. Cho and T. S. Seo, *Adv. Mater.*, 2013, **25**, 3657-3662.
